# Supplementary material for: MATR3‐antisense LINE1 RNA meshwork scaffolds higher‐order chromatin organization
Source: PubMed Central journal article supplement — EMBO Rep. 2023 Jun 29;24(8):e57550. doi: 10.15252/embr.202357550 (PMC10398674; doi:10.15252/embr.202357550), 2023-06-29
Supplement: EMBR-24-e57550-s005.pdf [file EMBR-24-e57550-s005.pdf]

# **MATR3-antisense LINE1 RNA meshwork scaffolds higher-order chromatin organization**

Yuwen Zhang, Xuan Cao, Zehua Gao, Xuying Ma, Qianfeng Wang, Xiaoxuan Xu,  
Xiumei Cai, Yan Zhang, Zhao Zhang, Gang Wei, Bo Wen

## **Appendix Contents**

|                                                                                                                     |           |
|---------------------------------------------------------------------------------------------------------------------|-----------|
| <b>Appendix Figure S1.</b> The correlation between MATR3 and histone modification markers. ....                     | <b>2</b>  |
| <b>Appendix Figure S2.</b> RNAs help maintaining the meshwork structure of MATR3 proteins in nuclei. ....           | <b>4</b>  |
| <b>Appendix Figure S3.</b> MATR3 proteins interplay with RNAs in vitro. ....                                        | <b>6</b>  |
| <b>Appendix Figure S4.</b> The overall view of Hi-C datasets. ....                                                  | <b>8</b>  |
| <b>Appendix Figure S5.</b> Mapping statistics of Hi-C sequencing data of two replicates in Ctrl and MATR3-AID. .... | <b>10</b> |
| <b>Appendix Figure S6.</b> Functional relevance of MATR3-AS L1 RNA associated genes ....                            | <b>12</b> |
| <b>Appendix Figure S7.</b> Biological consequences caused by the structure changes of SAMMY domains ....            | <b>14</b> |
| <b>Appendix Figure S8.</b> Nuclear distribution pattern of ALS associated mutants in N2A cells. ....                | <b>16</b> |

# Appendix Figure S1

**A** AML12 Cells

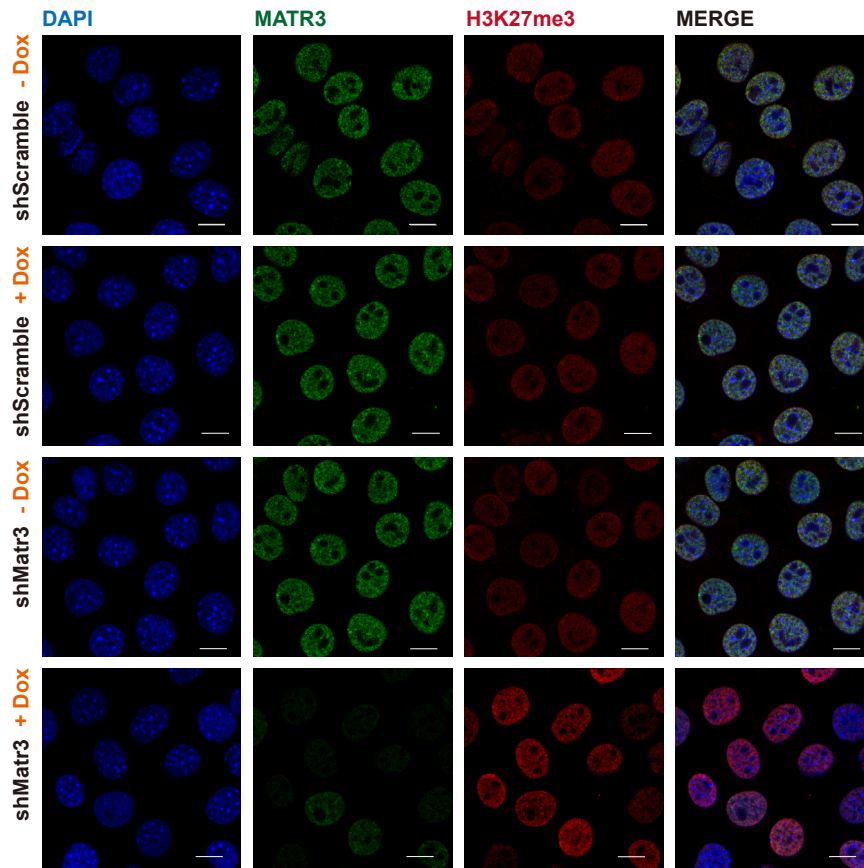

**B** ES Cells

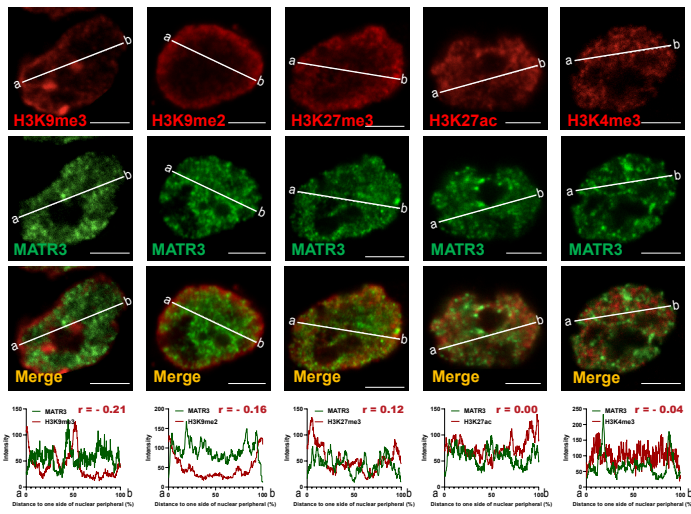

**C** ES Cells

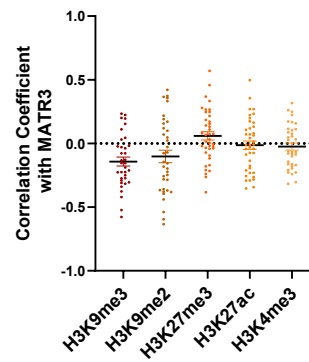

**Appendix Figure S1. The correlation between MATR3 and histone modification markers.**

**A** Representative cross-section images showing nuclear distribution of MATR3 and H3K27me3 in cells transfected with inducible-shRNA targeting to scrambled sequence (shScramble) or *Matr3* gene (shMatr3) before (-Dox) and after (+Dox) 72h treating with 1µg/ml Dox. Scale bars, 10µm.

**B** (Upper) Representative cross-section images showing relative distribution between MATR3 and histone modifications (H3K9me3, H3K9me2, H3K27me3, H3K27ac and H3K4me3) in ES cells. (Lower) Line charts showing pixel intensity of each channel on the regions of interest (ROI).  $r$ , coefficient of correlation. Scale bars, 5µm.

**C** Coefficient of correlation between MATR3 and histone modification H3K9me3 (n=35), H3K9me2 (n=36), H3K27me3 (n=40), H3K27ac (n=40) and H3K4me3 (n=36) in ES cells. Quantifications were performed on randomly selected ROIs in cell nuclei. Each point represents one cell.

# Appendix Figure S2

**A** AML12 Cells

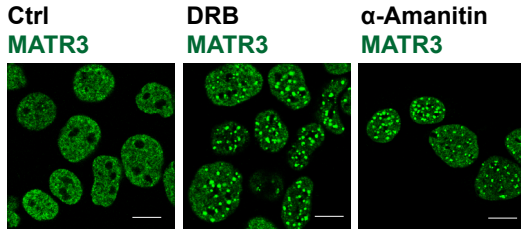

**B** AML12 Cells

(Pretreat with Triton x-100)

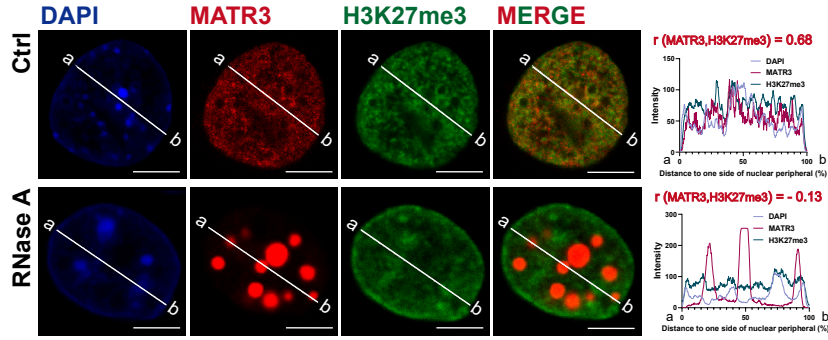

**C** AML12 Cells

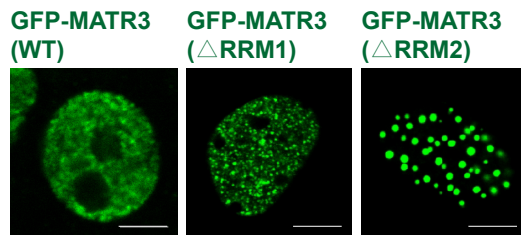

**D** AML12 Cells

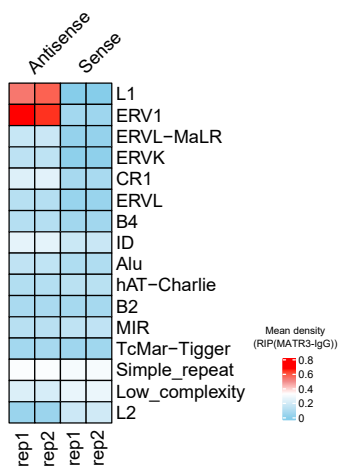

**E** ES Cells

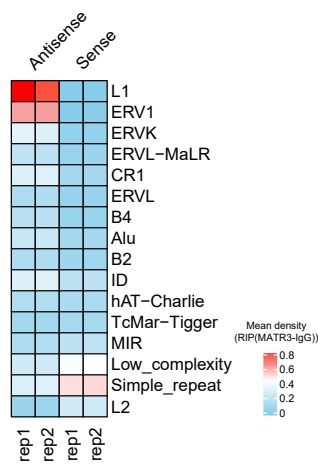

**Appendix Figure S2. RNAs help maintaining the meshwork structure of MATR3 proteins in nuclei.**

**A** The representative cross-section image showing nuclear distribution of MATR3 after 24h treating with 75 $\mu$ M DRB or 24h treating with 50 $\mu$ g/mL  $\alpha$ -amanitin in AML12 cells. Scale bars, 10 $\mu$ m.

**B** (Left) The representative cross-section image showing nuclear distribution of DAPI, MATR3 and H3K27me3 before and after RNase A treatment (pretreat with 0.05% Triton x-100 for 30s, followed by 10 $\mu$ g/ml RNase A for 1h) in AML12 cells. Ctrl cells were treated with 0.05% Triton x-100 for 30s. (Right) Line charts showing pixel intensity of each channel on the ROIs.  $r$ , coefficient of correlation. Scale bars, 5 $\mu$ m.

**C** The representative cross-section image showing nuclear distribution of GFP-tagged MATR3-WT, MATR3- $\Delta$ RRM1 and MATR3- $\Delta$ RRM2. Scale bars, 5 $\mu$ m.

**D** and **E** Heatmap of MATR3 RIP-seq sense and antisense signal in repetitive elements in AML12 cells (**D**) and ES cells (**E**). All RE copies with the RIP (MATR3 -IgG) count number  $\geq 10$  are kept. For each RE family, RE copies from antisense and sense of two replicates are merged. Then compute the RPM of RIP (MATR3 -IgG) signal for RE copies and compute the mean RPM of each sample. The color indicates the mean density of RIP (MATR3 -IgG) for each RE family.

## Appendix Figure S3

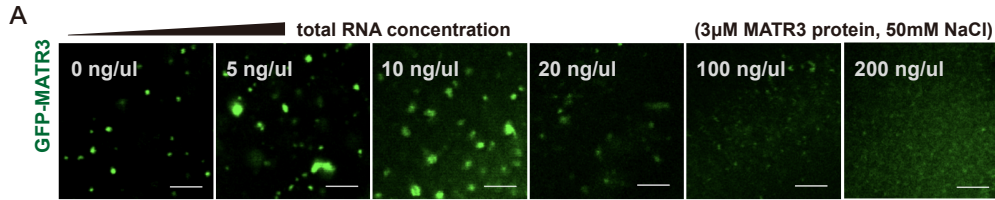

**B** Sense L1 RNA derived from 3' truncation of L1 Md\_F2 ORF2 element ( 0 MATR3-binding motifs)

```
AAAAGCACUCUGGAAUUCAGUCUGGCAGUUCUCAGAAAAUUGGACA
UACUACUACUGGAGGAUCCCGCAAUACCUUCUCUGGGCAUUAUCCAGA
AGAUUUCACACCGGUAAGAAGGACCAUGCUCACUAUGUUCUAUAG
UAGCCUUGUUUAUUAUAGCCAGAAGCUGGAAAGAACCCAGAUAGCGCC
UCAACAGAGGAAUGGAUACAGAAAAUGUGGUACAUUUACACAAUGGU
AUACUACUCAGCUAUUUUUAAAAAUGUAUUUAUGAAAAUCCUAGGCA
AAUGGAUGGACCUGGAGGUAUCAUCCUGAGUGAG
```

Antisense L1 RNA derived from 3' truncation of L1 Md\_F2 ORF2 element ( 4 MATR3-binding motifs)

```
CUCACUCAGGAUGAUACCCUCCAGGUCAUCCAUUUGCCUAGGAAUU
UCAUAAAUAUACAUUUUUUUAAAAUAGCUGAGUAGUAUACCAUUGUGUAA
AUGUACCACAUUUUCUUCUUCJCCAUCCUCUGUUGAGGCGCAUCUGGG
UUCUUUCUAGCUUCUGGCUAUUUUAAACAAGGCUACUAUGAACAUAGU
GGAGCAUGGGUCCUUCUUAACGGUUGGGAAAUCUUCUGGAUUAUGCC
AGGAGAGGUUUUGCGGAUCCUCCAGUAGUAGUAUGUCCAAUUUUUCU
GAGGAACUGCCAGACUGAUUUCCAGAGUGCUUUU
```

Sense B1 RNA ( 0 MATR3-binding motifs)

```
GCCGGGCAUGGGUGGCGCACGCCUUUAAUCCAGCACUUGGGAGGCA
GAGGCAGGCGGAUUUCUGAGUUCGAGGCCAGCCUGGUCUACAAAGUG
AGUUCAGGACAGCCAGGGCUACACAGAGAAACCCUGUCUCGA
```

Antisense B1 RNA ( 0 MATR3-binding motifs)

```
UCGAGACAGGGUUUCUCUGUGUAGCCUGGCUGUCCUGGAACUCACU
UUGUAGACCAGGCUGGCCUCGAACUCAGAAAUCGCCUGCCUCUGCC
UCCCAAGUCUGGGAUUAAAGGCGUGGCCACCCAUGCCCGGC
```

Sense MajSAT RNA ( 0 MATR3-binding motifs)

```
GGACCUGGAAUAUGGCGAGAAAACUGAAAUCACGAAAAUAGAGAAU
ACACACUUUAGGACGUGAAAUAUGGCGAGGAAAACUGAAAAAGGUGGA
AAAUUUAGAAAUGUCCACUGUAGGUCGUGGAAUAUGGCAAGAAAACUG
AAAAUCAUGGAAAUAAGAAAACUCCACUUGACGACUUGAAAAUAGC
GAAUACUAAAAACGUGAAAAUAGAAAUGCACACUGAA
```

**Appendix Figure S3. MATR3 proteins interplay with RNAs in vitro.**

**A** Representative images of droplet formation assays with 3  $\mu$ M GFP-MATR3 proteins and different concentration of total RNAs. NaCl concentration, 50mM.

**B** Sequences of sense L1 RNAs, antisense L1 RNAs, sense B1 RNAs, antisense B1 RNAs and sense MajSAT RNAs used in droplet formation assays. The 7-mer MATR3-binding motifs are highlighted.

# Appendix Figure S4

## A AML12 Cells

|                     | Ctrl rep1   | Ctrl rep2   | shMatr3 rep1 | shMatr3 rep2 |
|---------------------|-------------|-------------|--------------|--------------|
| Total reads         | 595,419,066 | 611,165,131 | 601,429,299  | 617,926,024  |
| Mapped R1           | 554,454,338 | 569,274,150 | 563,446,803  | 579,826,895  |
| Mapped R2           | 529,893,326 | 532,821,932 | 524,714,852  | 555,806,207  |
| Unique pairs        | 323,705,058 | 323,766,223 | 323,563,215  | 340,495,760  |
| Dangling ends pairs | 6,426,405   | 8,405,944   | 6,603,828    | 5,462,148    |
| Self circle pairs   | 141,066     | 124,164     | 124,614      | 146,389      |
| Dumped pairs        | 5,217       | 5,780       | 8,317        | 5,989        |
| Valid pairs         | 311,080,734 | 308,726,195 | 310,825,335  | 329,239,157  |
| Unique valid pairs  | 207,957,571 | 208,370,315 | 201,305,924  | 234,105,937  |
| Cis interaction     | 171,414,301 | 172,223,273 | 164,160,012  | 190,299,049  |
| Trans interaction   | 36,543,270  | 36,147,042  | 37,145,912   | 43,806,888   |
| Contacts>20k        | 148,113,808 | 148,178,911 | 141,917,458  | 164,786,892  |

## B AML12 Cells

Correlation of compartment PC1 values between samples

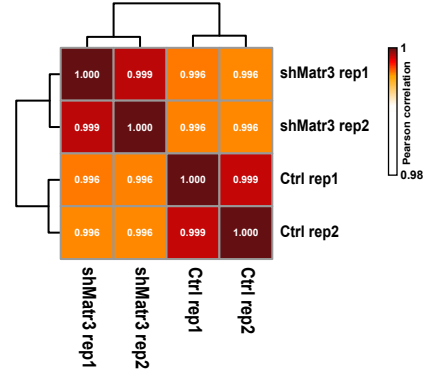

## C AML12 Cells

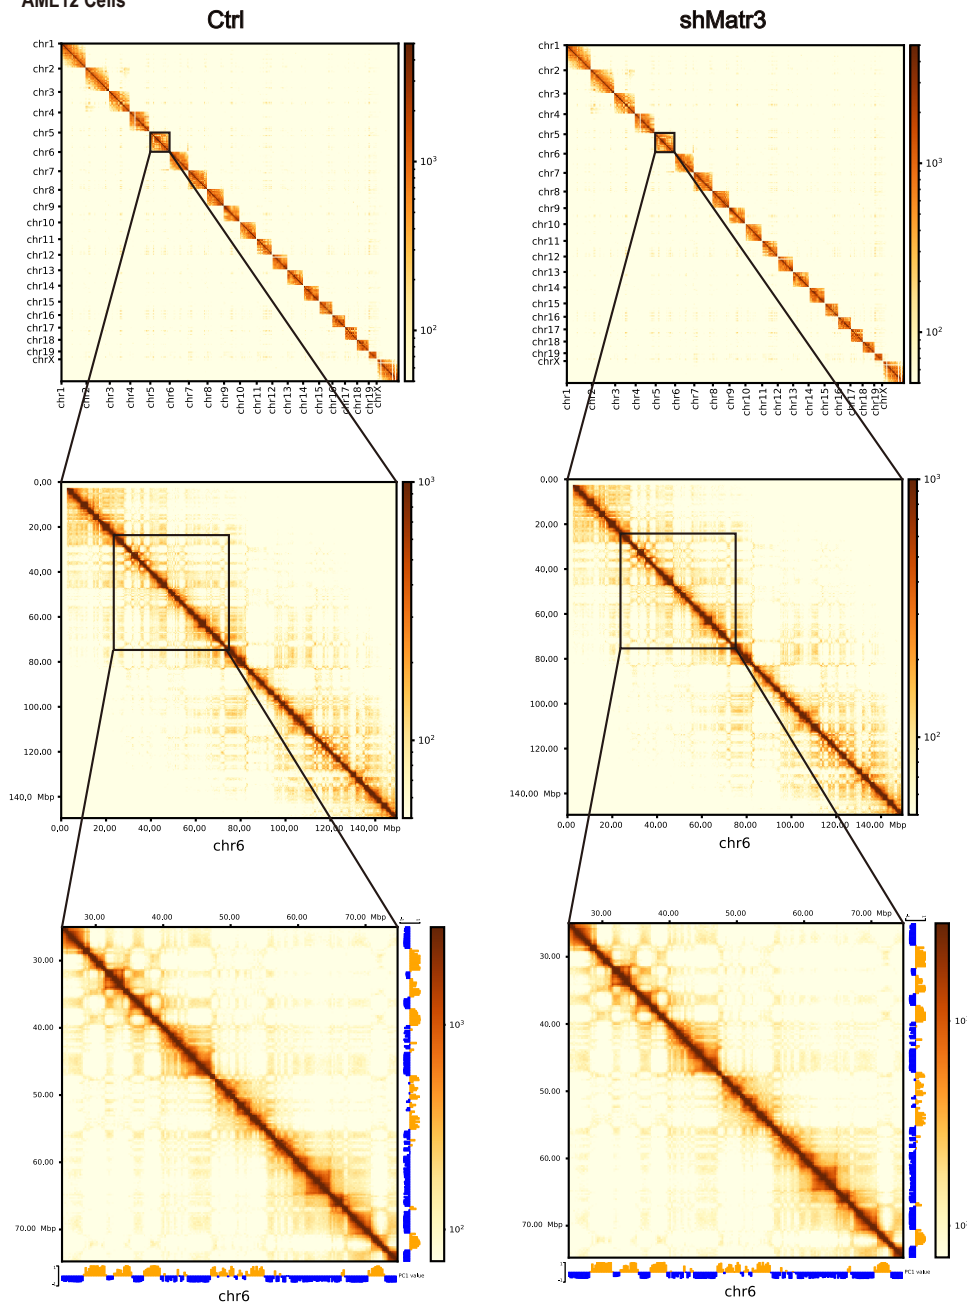



**Appendix Figure S4. The overall view of Hi-C datasets.**

**A** Mapping statistics of Hi-C sequencing data of two replicates in Ctrl and shMatr3 AML12 cells.

**B** Pearson correlation coefficients of PC1 values at 250 kb resolution between replicates.

**C** Hi-C contact maps in Ctrl and shMatr3: whole genome at 1MB resolution (top); Chr6 at 250kb resolution (middle); chr6:27-73 Mb at 250kb resolution (down).

## Appendix Figure S5

### ES Cells

|                     | Ctrl rep1   | Ctrl rep2   | MATR3-AID rep1 | MATR3-AID rep2 |
|---------------------|-------------|-------------|----------------|----------------|
| Total reads         | 428,727,232 | 459,542,741 | 436,359,212    | 461,177,436    |
| Mapped R1           | 393,627,743 | 432,545,672 | 402,625,219    | 425,730,135    |
| Mapped R2           | 361,654,965 | 388,843,588 | 365,601,945    | 390,736,864    |
| Unique pairs        | 216,540,949 | 235,260,893 | 224,293,542    | 238,756,442    |
| Dangling ends pairs | 3,160,315   | 3,909,828   | 4,964,669      | 4,360,881      |
| Self circle pairs   | 100,579     | 102,052     | 99,640         | 117,170        |
| Dumped pairs        | 4,424       | 4,003       | 3,786          | 4,162          |
| Valid pairs         | 210,093,154 | 228,351,131 | 215,776,060    | 230,817,355    |
| Unique valid pairs  | 157,272,810 | 180,497,484 | 169,680,300    | 178,880,239    |
| Cis interaction     | 127,341,407 | 141,054,726 | 136,915,485    | 144,208,459    |
| Trans interaction   | 29,931,403  | 39,442,758  | 32,764,815     | 34,671,780     |
| Contacts>20k        | 112,570,546 | 126,060,303 | 121,273,440    | 127,885,199    |

**Appendix Figure S5. Mapping statistics of Hi-C sequencing data of two replicates in Ctrl and MATR3-AID ES cells.**

# Appendix Figure S6

A AML12 cells

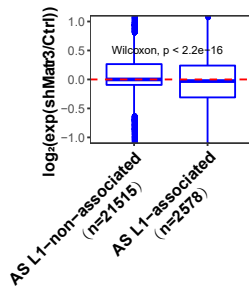

B AML12 & ES cells

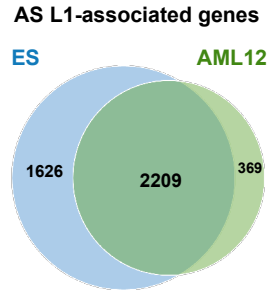

C AML12 & ES cells

Top10 GO/KEGG term of AS L1-associated genes

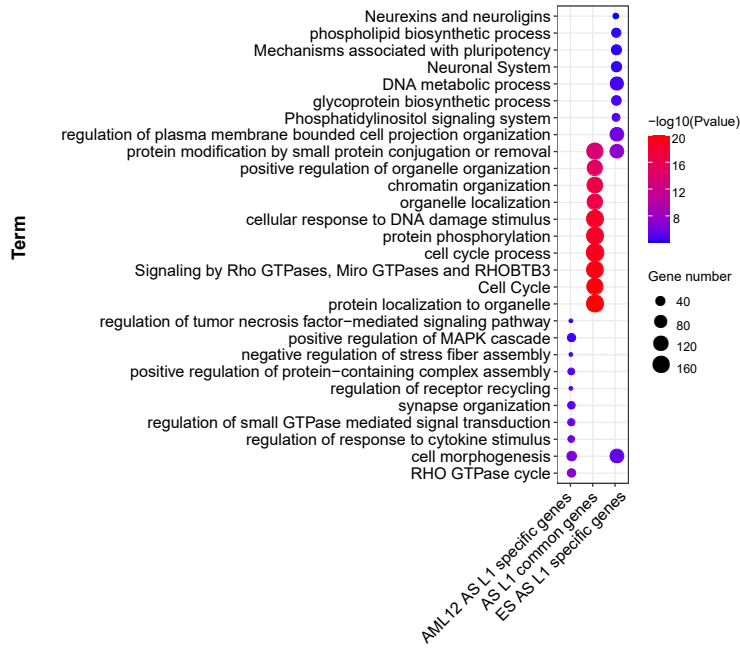

D AML12 cells

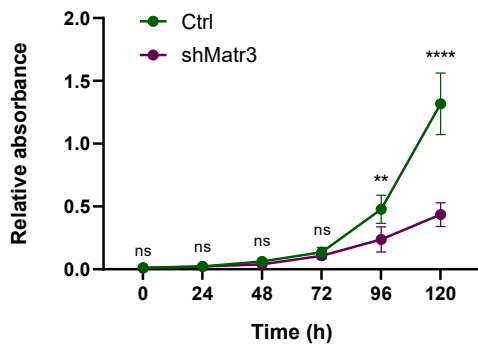

E AML12 cells

Top20 GO/KEGG term of AS L1-associated DEGs

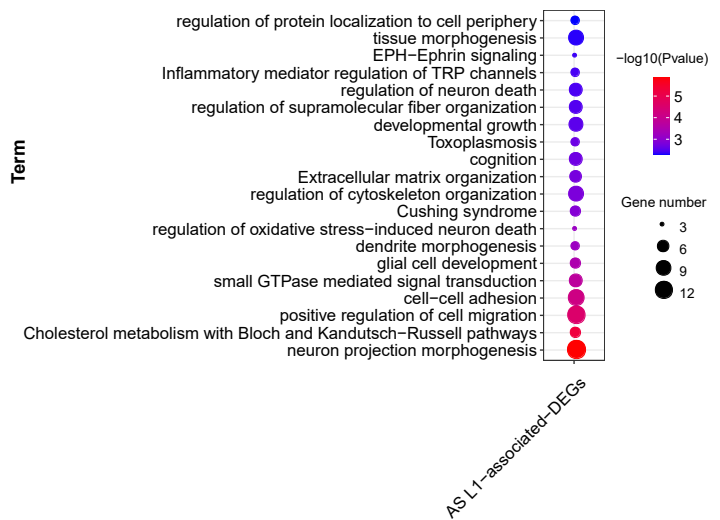

**Appendix Figure S6. Functional relevance of MATR3-AS L1 RNA associated genes**

**A** Box plot shows gene expression changes in MATR3-AS L1 RNAs non-associated TADs and associated TADs.

**B** Genes that enriched with MATR3-AS L1 RNAs overlap between ESC and AML12 cells.

**C** Top enriched GO/KEGG terms for genes from groups in **B**. Bubble colours represent the corrected P value. Bubble sizes indicate the number of of genes involved in each term.

**D** Viability of AML12 cells before and after MATR3 knockdown as detected by CCK-8 assay (n = 7). The P values were calculated using unpaired two-tailed Student's t test; \*p<0.05, \*\*\*p<0.0001. Error bars indicate mean  $\pm$  s.e.m.

**E** Top enriched GO/KEGG terms for AS L1- associated DEGs (Ctrl vs shMatr3) from AML12 cells. Bubble colours represent the corrected P value. Bubble sizes indicate the number of of genes involved in each term.

# Appendix Figure S7

## A AML12 cells

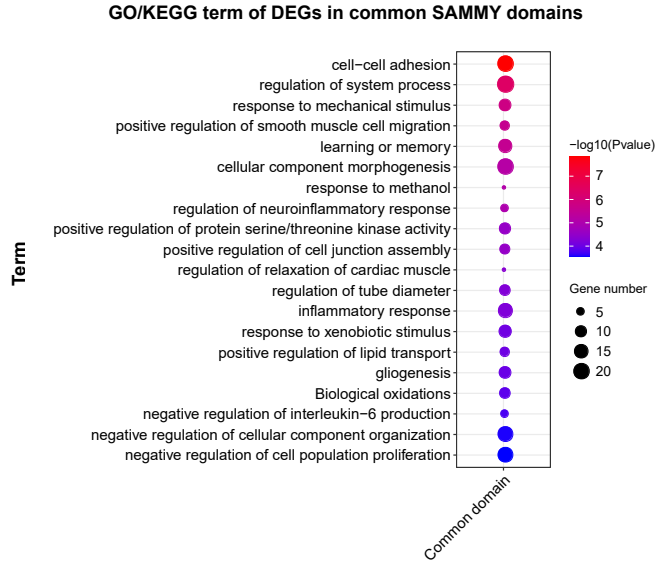

## B AML12 cells

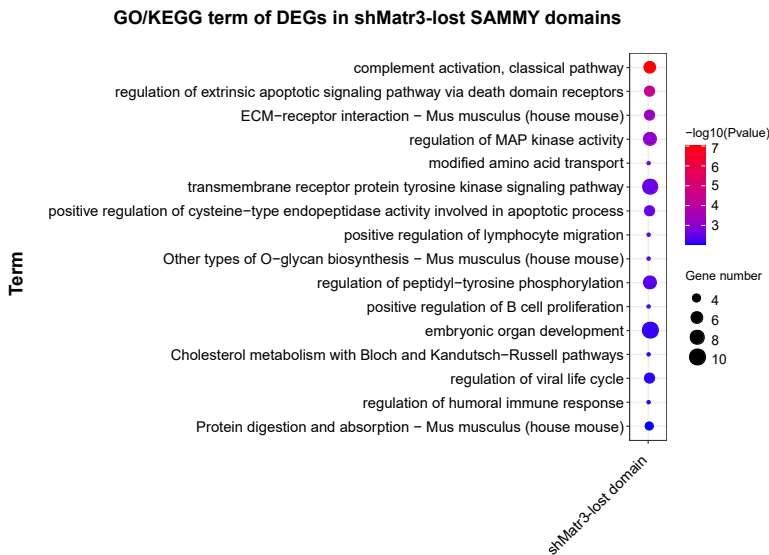

## C AML12 cells

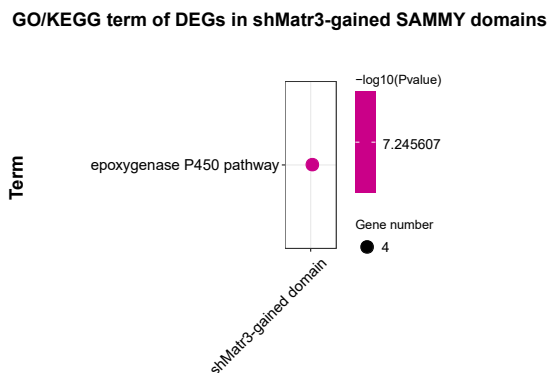

**Appendix Figure S7. Biological consequences caused by the structure changes of SAMMY domains**

Bubble plots showing top enriched GO/KEGG terms for DEGs from common (A), shMatr3-lost (B) and shMatr3-gained (C) SAMMY domains. Bubble colours represent the corrected P value. Bubble sizes indicate the number of of DEGs involved in each term.

# Appendix Figure S8

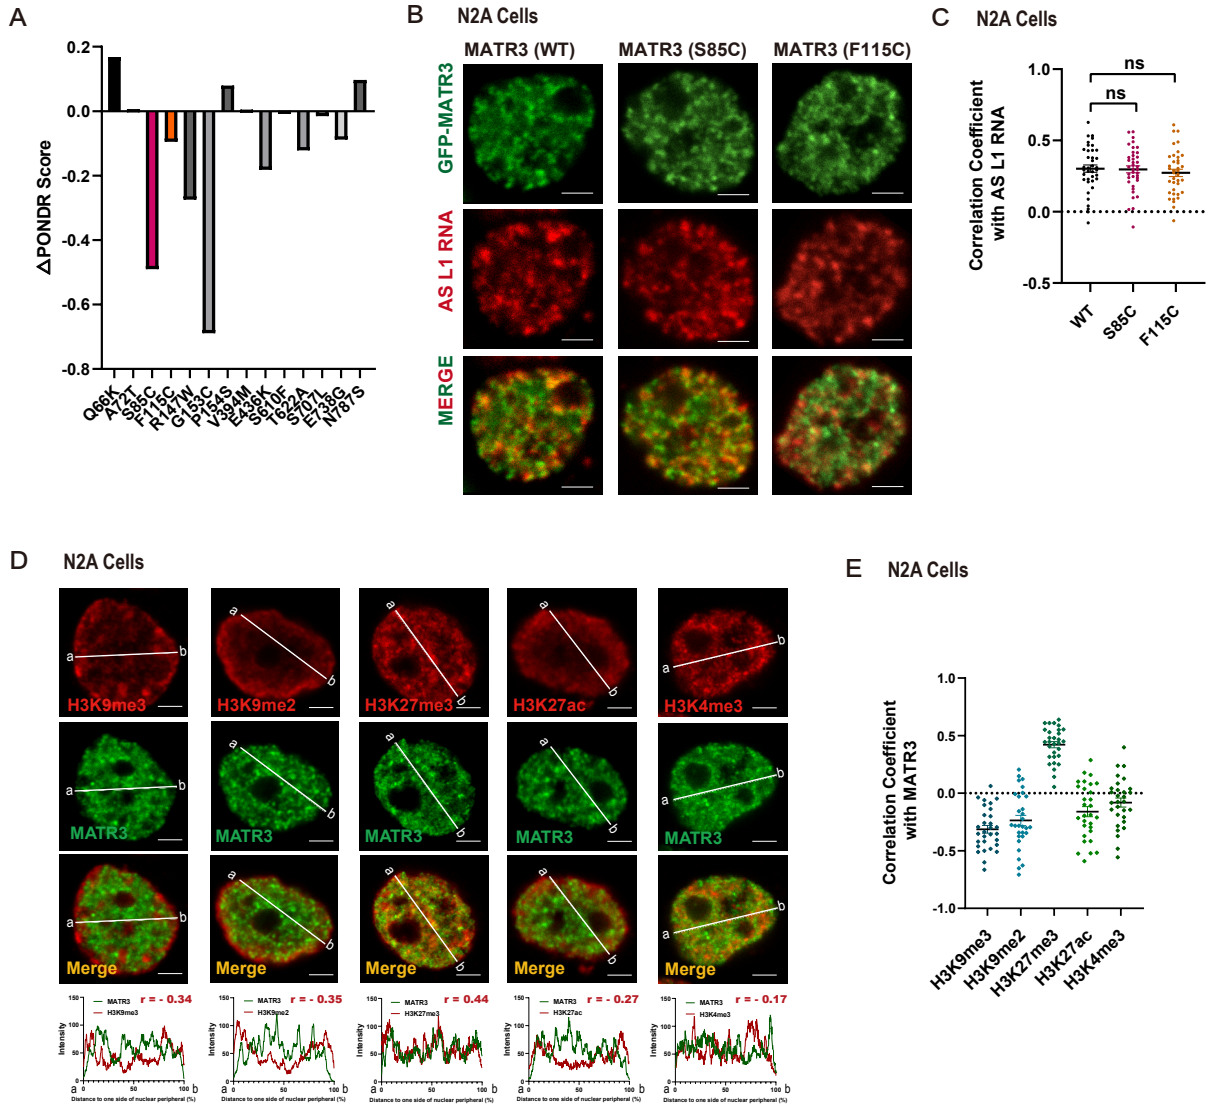



**Appendix Figure S8. Nuclear distribution pattern of ALS associated mutants in N2A cells.**

**A** The difference of PONDR score at the mutation point between wild-type MATR3 and degenerative-disease-associated MATR3 mutants.

**B** The representative images showing nuclear colocalization of AS L1 RNAs with wild-type (WT) and mutant (S85C/F115C) GFP-MATR3 proteins in N2A cells. Scales bar, 5 $\mu$ m.

**C** Coefficient of correlation between AS L1 RNA with wild-type and mutant GFP-MATR3 proteins. WT (n=38), S85C (n=38), F115C (n=38). The P values were calculated using unpaired two-tailed Student's t test; ns, not significant. Error bars indicate mean  $\pm$  s.e.m.

**D** (Upper) Representative cross-section images showing relative distribution between MATR3 and histone modifications (H3K9me3, H3K9me2, H3K27me3, H3K27ac and H3K4me3) in N2A cells. (Lower) Line charts showing pixel intensity of each channel on the regions of interest (ROI). r, coefficient of correlation. Scales bar, 5 $\mu$ m.

**E** Coefficient of correlation between MATR3 and histone modification H3K9me3 (n=30), H3K9me2 (n=30), H3K27me3 (n=30), H3K27ac (n=30) and H3K4me3 (n=30) in N2A cells. Quantifications were performed on randomly selected ROIs in cell nuclei. Each point represents one cell. Error bars indicate mean  $\pm$  s.e.m.
